# Supplementary material for: Metal coordination and in situ S–C bond cleavage of the bis(2-pyridylthio)methane ligand
Source: Royal Society of Chemistry journal article supplement (doi:10.1039/c0dt00560f), 2010-01-01

## **Metal coordination and in situ S–C bond cleavage of the bis(2-pyridylthio)methane ligand**

Ana Belén Lago<sup>\*</sup>, Almudena Amoedo, Rosa Carballo<sup>\*</sup>, Emilia García-Martínez, Ezequiel M. Vázquez-López.

*Departamento de Química Inorgánica, Facultade de Química, Universidade de Vigo, E-36310 Vigo, Galicia, Spain. Fax: +34 986 812 556; Tel: +34 986 812 273; E-mail: [rcrial@uvigo.es](mailto:rcrial@uvigo.es) (RC), [ablago@uvigo.es](mailto:ablago@uvigo.es) (ABL)*

**Supplementary material**

Table S1. Iodine-iodine bond distances (Å) and angles (°) for the polyiodine network in [2bpytmH]<sub>2</sub>[I<sub>3</sub>]<sub>2</sub>[I<sub>2</sub>]

| Distance (Å)                                                                     |            | Angle (°)               |            |
|----------------------------------------------------------------------------------|------------|-------------------------|------------|
| <b>I<sub>2</sub> molecule</b>                                                    |            |                         |            |
| I5–I5 <sup>#iii</sup>                                                            | 2.786(2)   |                         |            |
| <b>I<sub>3</sub><sup>-</sup> ion</b>                                             |            |                         |            |
| I3–I4                                                                            | 2.9509(10) |                         |            |
| I4–I3 <sup>#ii</sup>                                                             | 2.9509(10) | I3–I4–I3 <sup>#ii</sup> | 180.0      |
| I1–I2                                                                            | 2.9136(10) | I1 <sup>#i</sup> –I2–I1 | 180.000(2) |
| I1–I2 <sup>#i</sup>                                                              | 2.9136(10) |                         |            |
| <b>I<sub>2</sub>...I<sub>3</sub><sup>-</sup> interaction</b>                     |            |                         |            |
| I5–I5...I3                                                                       | 3.4591(17) | I5–I5...I3              | 175.41     |
| <b>I<sub>3</sub><sup>-</sup>...I<sub>3</sub><sup>-</sup> interaction</b>         |            |                         |            |
| I <sub>3</sub> <sup>-</sup> ...I <sub>3</sub> <sup>-#iv</sup>                    | 3.9524(15) | I4–I3...I3              | 156.40(4)  |
| #i= -x, -y, -z+1; #ii= 2-x-1, -y, -z; #iii= 3-x, -y+1, -z;<br>#iv= 1-x, 1-y, 1-z |            |                         |            |

Table S2. Main hydrogen bond distances (Å) and angles (°).

| D–H...A                                                                                                  | d(D–H) | d(H...A) | d(D...A)  | ∠(DHA) |
|----------------------------------------------------------------------------------------------------------|--------|----------|-----------|--------|
| <b>2bpytm[I<sub>3</sub>][I<sub>2</sub>]</b>                                                              |        |          |           |        |
| N(1)–H(111)...N(11)                                                                                      | 0.86   | 1.88     | 2.691(11) | 158    |
| C(13)–H(13)...I(2) <sup>i</sup>                                                                          | 0.93   | 3.08     | 3.843(10) | 140    |
| <i>i</i> = -1+x, y, z                                                                                    |        |          |           |        |
| <b>[CoBr<sub>2</sub>(2bpytm)].H<sub>2</sub>O (1)</b>                                                     |        |          |           |        |
| O1–H1...Cl1 <sup>i</sup>                                                                                 | 0.97   | 2.64     | 3.314(3)  | 127    |
| C4–H4...O1 <sup>ii</sup>                                                                                 | 0.93   | 2.53     | 3.359(3)  | 148    |
| C1–H1A...Cl1 <sup>iii</sup>                                                                              | 0.97   | 2.85     | 3.5834(7) | 133    |
| C6–H6...S1 <sup>iv</sup>                                                                                 | 0.93   | 2.95     | 3.859(3)  | 165    |
| <i>i</i> = x, -1+y, z; <i>ii</i> = ½-x, ½-y, -z; <i>iii</i> = -½+x, -½+y, z; <i>iv</i> = ½+x, ½+y, z     |        |          |           |        |
| <b>[CoBr<sub>2</sub>(2bpytm)] (2)</b>                                                                    |        |          |           |        |
| C1–H1B...Br2 <sup>i</sup>                                                                                | 0.97   | 2.83     | 3.785(3)  | 170    |
| C15–H15... Br1 <sup>ii</sup>                                                                             | 0.93   | 2.88     | 3.606(4)  | 136    |
| C14–H14... Br1 <sup>iii</sup>                                                                            | 0.93   | 2.96     | 3.664(4)  | 134    |
| C4–H4... Br1 <sup>iv</sup>                                                                               | 0.93   | 3.09     | 3.723(4)  | 127    |
| <i>i</i> = ½-x, -½-y, z; <i>ii</i> = ½+x, ½-y, -z; <i>iii</i> = 1-x, 2-y, 1-z; <i>iv</i> = x, 1.5-y, ½+z |        |          |           |        |
| <b>[NiBr<sub>2</sub>(2bpytm)].H<sub>2</sub>O (4)</b>                                                     |        |          |           |        |
| O1–H11... Br1                                                                                            | 0.96   | 2.77     | 3.413(3)  | 126    |
| C1–H1A...Br1 <sup>i</sup>                                                                                | 0.97   | 2.88     | 3.6387(8) | 136    |
| C4–H4...O1 <sup>ii</sup>                                                                                 | 0.93   | 2.61     | 3.454(3)  | 152    |
| <i>i</i> = ½-x, -½+y, ½-z; <i>ii</i> = -½-x, ½-y, -z                                                     |        |          |           |        |
| <b>[CuBr<sub>2</sub>(2bpytm)]<sub>2</sub> (5)</b>                                                        |        |          |           |        |
| C15–H15...Br1 <sup>i</sup>                                                                               | 0.93   | 2.84     | 3.600(11) | 139    |
| C13–H13...Br1 <sup>ii</sup>                                                                              | 0.93   | 2.97     | 3.743(10) | 142    |
| C4–H4...Br2 <sup>iii</sup>                                                                               | 0.93   | 3.07     | 3.703(10) | 127    |
| <i>i</i> = 1-x, -½+y, ½-z; <i>ii</i> = x, -1.5-y, ½+z; <i>iii</i> = 2-x, ½+y, ½-z                        |        |          |           |        |
| <b>[CuBr<sub>2</sub>(2bpytm)]<sub>n</sub>.CH<sub>3</sub>CN (6)</b>                                       |        |          |           |        |
| C1–H1A...Br2 <sup>i</sup>                                                                                | 0.97   | 2.85     | 3.713(5)  | 149    |
| C4–H4...Br1 <sup>ii</sup>                                                                                | 0.93   | 3.04     | 3.725(5)  | 132    |
| C4–H4...N111 <sup>iii</sup>                                                                              | 0.93   | 2.61     | 3.248(8)  | 127    |
| C5–H5...N111 <sup>iii</sup>                                                                              | 0.93   | 2.77     | 3.322(8)  | 119    |
| <i>i</i> = 1-x, ½+y, ½-z; <i>ii</i> = 1+x, y, z; <i>iii</i> = -x, -½+y, ½-z                              |        |          |           |        |

Table S3. Torsion angles of the compounds with eight-membered chelate rings (**1**, **2**, **3** and **4**)

|                                                                             | Symmetry       | $\tau_1$   | $\tau_2$ | $\tau_3$  | $\tau_4$   | $\tau_5$   | $\tau_6$  | $\tau_7$ | $\tau_8$   |
|-----------------------------------------------------------------------------|----------------|------------|----------|-----------|------------|------------|-----------|----------|------------|
| <b>[2bpytmH]<sub>2</sub><br/>[I<sub>3</sub>]<sub>2</sub>[I<sub>2</sub>]</b> | C <sub>1</sub> | -84.6      | 3.6      | -44.2(9)  | 123.6(7)   | -77.2(7)   | 6.1(10)   | -7.0     | 117.8      |
| <b>1</b>                                                                    | C <sub>2</sub> | -35.78(15) | 5.0(2)   | 86.74(18) | -67.67(7)  | -67.67(7)  | 86.74(18) | 5.0(2)   | -35.78(15) |
| <b>2</b>                                                                    | C <sub>1</sub> | 42.5(3)    | -4.4(3)  | -89.7(3)  | 66.2(2)    | 66.7(2)    | -89.9(3)  | 3.0(3)   | 22.3(3)    |
| <b>3</b>                                                                    | C <sub>1</sub> | 22.6(7)    | -4.7(8)  | -80.8(6)  | 68.3(5)    | 66.7(5)    | -89.0(6)  | -6.5(7)  | 48.9(6)    |
| <b>4</b>                                                                    | C <sub>2</sub> | -34.14(17) | -0.8(2)  | 86.3(2)   | -72.17(10) | -72.17(10) | 86.3(2)   | -0.8(2)  | -34.14(17) |

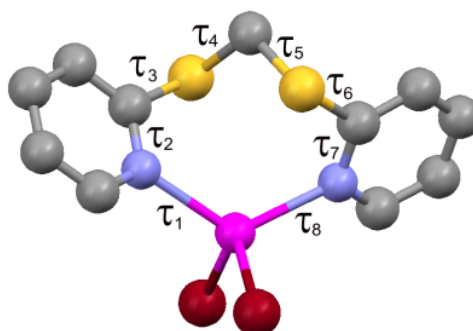

Supplement: c0dt00560f.pdf [file c0dt00560f.pdf]
